# Supplementary material for: Advantage of HSP110 (T17) marker inclusion for microsatellite instability (MSI) detection in colorectal cancer patients
Source: PubMed Central journal article supplement (PMC6033349; doi:10.18632/oncotarget.25611), 2018-06-19
Supplement: oncotarget-09-28691-s001.pdf [file oncotarget-09-28691-s001.pdf]

## Advantage of *HSP110* (T17) marker inclusion for microsatellite instability (MSI) detection in colorectal cancer patients

### SUPPLEMENTARY MATERIALS

**Supplementary Table 1: Summary of cases with discordant data between immunohistochemistry and molecular MSI analysis**

| Sample ID | Age | Primary Tumor Localization | Histologic Grade | Histologic Type          | MMR Gene Mutated <sup>#</sup> | IHC status | Molecular MSI status | Molecular MSI alleles |         |         |         |         | <i>HSP110</i> (T17) status | <i>HSP110</i> (T17) alleles |
|-----------|-----|----------------------------|------------------|--------------------------|-------------------------------|------------|----------------------|-----------------------|---------|---------|---------|---------|----------------------------|-----------------------------|
|           |     |                            |                  |                          |                               |            |                      | NR27                  | NR21    | NR24    | BAT25   | BAT26   |                            |                             |
| 11.0011   | 66  | Colon                      | III              | Adenocarcinoma           | not performed                 | Negative   | MSS                  | 85/85                 | 105/105 | 121/121 | 146/146 | 177/178 | Altered*                   | 131/131                     |
| 12.0767   | 68  | Rectum                     | II               | Adenocarcinoma           | not performed                 | Negative   | MSS                  | 85/85                 | 101/105 | 122/122 | 145/145 | 177/177 | Altered*                   | 131/131                     |
| 11.0226   | 46  | Colon                      | II               | Adenocarcinoma           | <i>MHS6</i>                   | Negative   | MSI-L                | 84/84                 | 105/105 | 122/122 | 141/146 | 177/177 | Altered*                   | 132/132                     |
| 13.0395   | 57  | Cecum                      | II               | Adenocarcinoma           | not performed                 | Negative   | MSI-L                | 83/83                 | 103/105 | 122/122 | 141/147 | 177/178 | Altered*                   | 131/131                     |
| 11.0404   | 55  | Colon                      | III              | Mucinous Adenocarcinoma  | not performed                 | Positive   | MSI-H                | 78/86                 | 101/104 | 123/123 | 142/144 | 168/177 | Altered                    | 129/132                     |
| 11.0827   | 64  | Colon                      | II               | Mucinous Adenocarcinoma  | <i>MHS6</i>                   | Positive   | MSI-H                | 82/84                 | 98/104  | 120/123 | 139/141 | 167/174 | Altered                    | 129/132                     |
| 13.0578   | 89  | Colon                      | III              | Medullary Adenocarcinoma | not performed                 | Positive   | MSI-H                | 71/85                 | 93/105  | 113/122 | 140/146 | 164/175 | Altered                    | 128/131                     |
| 13.1023   | 46  | Cecum                      | I                | Adenocarcinoma           | not performed                 | Positive   | MSI-H                | 75/86                 | 95/105  | 119/122 | 136/145 | 165/176 | Altered                    | 125/131                     |

*HSP110* (T17) status obtained by comparison between normal and tumor tissue DNA from the samples and also by R method.

MMR: mismatch repair; #: germline mutation; MSS: microsatellite stability; MSI-L: low-microsatellite instability; MSI-H: high-microsatellite instability; \*: analyzed by R method.
